# Supplementary material for: NiCo2O4 nanostructure materials: morphology control and electrochemical energy storage
Source: Royal Society of Chemistry journal article supplement (doi:10.1039/c4dt02276a), 2014-01-01
Supplement: c4dt02276a1.pdf [file c4dt02276a1.pdf]

## Supporting Information

### **NiCo<sub>2</sub>O<sub>4</sub> Nanostructures Materials: Morphology Control and Electrochemical Energy Storage**

Deyang Zhang<sup>†a,b</sup>, Hailong Yan<sup>†a,b</sup>, Yang Lu<sup>†a,b,c</sup>, Kangwen Qiu<sup>†a,b</sup>, Chunlei Wang<sup>a,b</sup>, Yihe Zhang<sup>d</sup>, Xianming Liu<sup>e</sup>, Jingshan Luo<sup>f</sup>, Yongsong Luo<sup>\*a,b,f</sup>

<sup>a</sup> School of Physics and Electronic Engineering, Xinyang Normal University, Xinyang 464000, P. R. China

<sup>b</sup> Key Laboratory of Advanced Micro/Nano Functional Materials, Xinyang Normal University, Xinyang 464000, P. R. China

<sup>c</sup> School of Material Science and Engineering, Hebei University of Technology, Tianjin 300130, P. R. China

<sup>d</sup> School of Materials Science and Technology, China University of Geosciences, Beijing 100083, P. R. China

<sup>e</sup> College of Chemistry and Chemical Engineering, Luoyang Normal University, Luoyang 471022, P. R. China

<sup>f</sup> Division of Physics and Applied Physics, School of Physical and Mathematical Sciences, Nanyang Technological University, 637371, Singapore

---

\* To whom correspondence should be addressed: E-mail: [ysluo@xynu.edu.cn](mailto:ysluo@xynu.edu.cn)

† These authors contribute equally to this work.



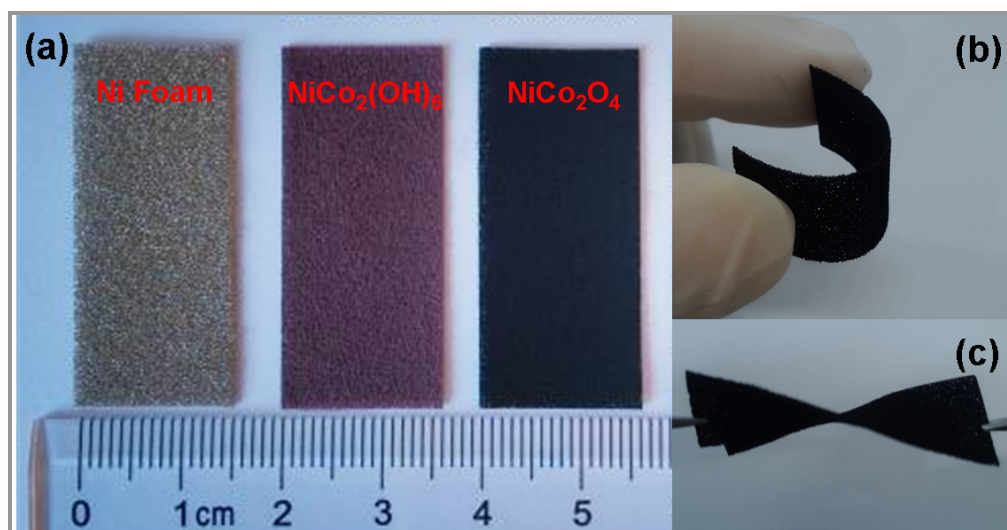

**Fig. S1** Photographs of nickel foam substrate, NiCo<sub>2</sub>(OH)<sub>6</sub> precursor on nickel foam, NCONNs on nickel foam.

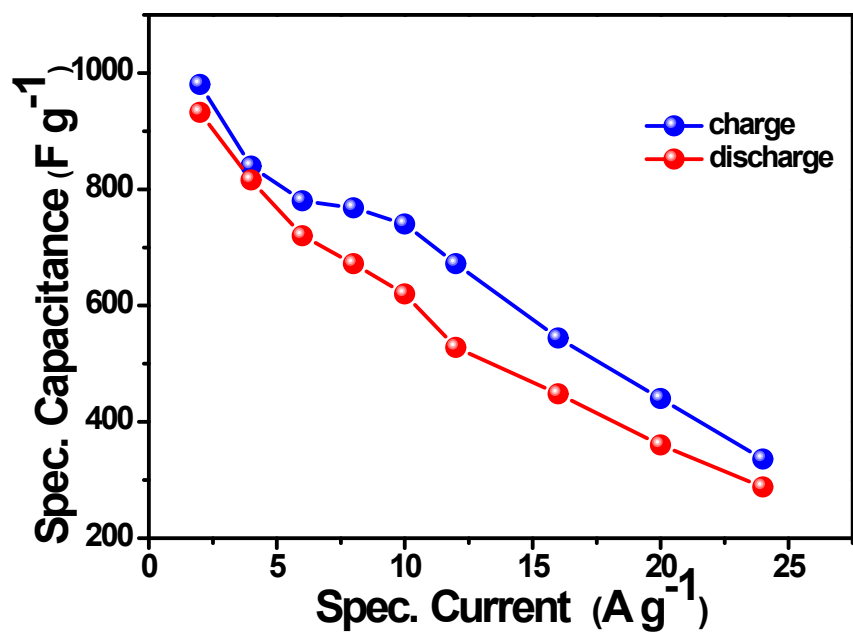

Fig. S2 Specific capacitance as a function of current density of NCONNs.

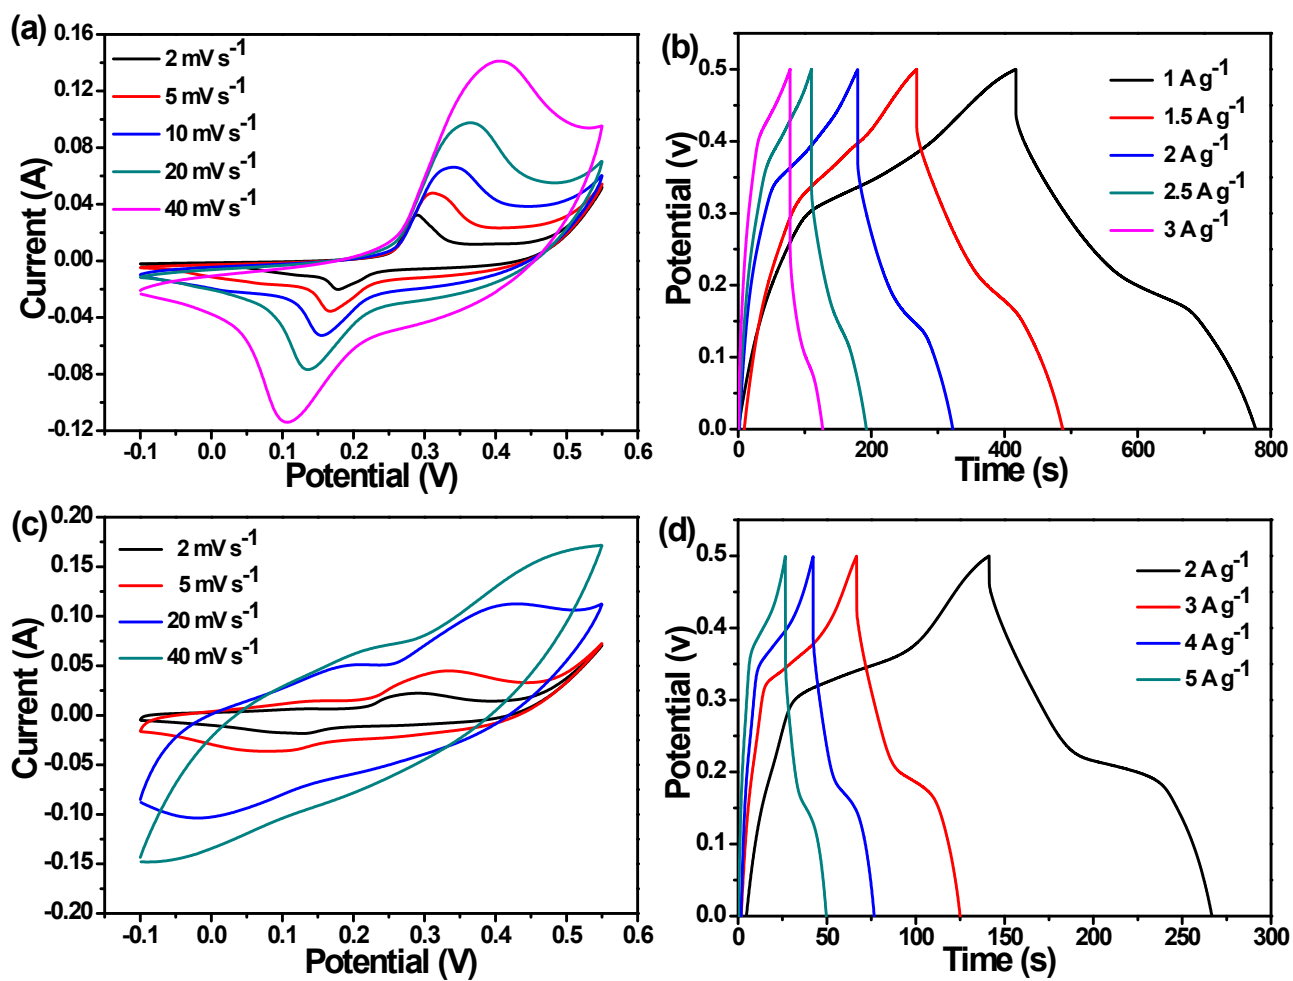

**Fig. S3** (a, c) shows The CV curves and (b, d) shows the galvanostatic charge-discharge curves of the NCONSs and NCONFs, respectively.
